# Supplementary material for: Association between improvement of clinical signs and decrease of ventricular volume after ventriculoperitoneal shunting in dogs with internal hydrocephalus
Source: PubMed Central journal article supplement — J Vet Intern Med. 2019 Apr 8;33(3):1368–75. doi: 10.1111/jvim.15468 (PMC6524126; doi:10.1111/jvim.15468), 2019-04-08
Supplement: JVIM-33-1368-s001.pdf [file JVIM-33-1368-s001.pdf]

**Supplemental Table 1:** Overview about the epidemiologic data, results of neurologic examination, measurements of brain- and ventricular volume as well as ventricular reduction before surgery 3 months after ventriculo-peritoneal shunting

|    | Breed, gender, age                           | MRI findings                                                    | Neurologic signs before surgery                                      | Duration of signs (weeks) | Volumes before surgery (cm <sup>3</sup> )         | Volumes after surgery (cm <sup>3</sup> )          | Reduction of ventricular volume | Neurologic signs after surgery                                       |
|----|----------------------------------------------|-----------------------------------------------------------------|----------------------------------------------------------------------|---------------------------|---------------------------------------------------|---------------------------------------------------|---------------------------------|----------------------------------------------------------------------|
| 1  | Chihuahua, male, 12 weeks                    | Biventricular hydrocephalus, supracollicular fluid accumulation | Obtundation, ataxia of all four limbs, reduced menace response       | 8                         | Ventricle: 20.4<br>Brain: 79<br>V/B index: 0.25   | Ventricle: 4.6<br>Brain: 93<br>V/B index: 0.04    | 77.5%                           | none                                                                 |
| 2  | Boston terrier, male, 22 weeks               | Tetraventricular hydrocephalus, moderate syringomyelia          | Obtundation, ataxia of all four limbs, circling, aimless barking     | 4                         | Ventricle: 26<br>Brain: 86<br>V/B index: 0.3      | Ventricle: 6.7<br>Brain: 105<br>V/B index: 0.06   | 74.3%                           | none                                                                 |
| 3  | Jack Russel terrier, female, 18 weeks        | Biventricular hydrocephalus                                     | Central blindness, ataxia of all four limbs                          | 4                         | Ventricle: 21<br>Brain: 65<br>V/B index: 0.32     | Ventricle: 21<br>Brain: 65<br>V/B index: 0.32     | 0                               | Central blindness, ataxia of all four limbs                          |
| 4  | Chihuahua, female, 41 weeks                  | Tetraventricular hydrocephalus                                  | Obtundation, hypermetric ataxia of all four limbs, central blindness | 12                        | Ventricle: 24.9<br>Brain: 64.8<br>V/B index: 0.38 | Ventricle: 12.8<br>Brain: 76.4<br>V/B index: 0.16 | 48.6%                           | Obtundation, hypermetric ataxia of all four limbs, central blindness |
| 5  | Mixed breed, female, 26 weeks                | Biventricular hydrocephalus                                     | Obtundation, ataxia of all four limbs, hypermetric gait              | 8                         | Ventricle: 18.9<br>Brain: 57.2<br>V/B index: 0.33 | Ventricle: 11.2<br>Brain: 64.9<br>V/B index: 0.17 | 40.8%                           | none                                                                 |
| 6  | Dachshund, female, 6 years                   | Biventricular hydrocephalus                                     | Obtundation                                                          | 12                        | Ventricle: 19.6<br>Brain: 58.4<br>V/B index: 0.33 | Ventricle: 6.4<br>Brain: 71.6<br>V/B index: 0.08  | 67.3%                           | none                                                                 |
| 7  | French bulldog, male, 3 years                | Tetraventricular hydrocephalus, moderate syringomyelia          | Obtundation, incontinence, intermittent head tilt                    | 48                        | Ventricle: 13.2<br>Brain: 67<br>V/B index: 0.19   | Ventricle: 6.2<br>Brain: 75<br>V/B index: 0.08    | 53.1%                           | none                                                                 |
| 8  | Australian shepherd, male, 16 weeks          | Biventricular hydrocephalus                                     | Obtundation, nystagmus, ataxia of all four limbs                     | 8                         | Ventricle: 23<br>Brain: 38<br>V/B index: 0.6      | Ventricle: 28<br>Brain: 43<br>V/B index: 0.52     | 21.8%                           | none                                                                 |
| 9  | Mini bullterrier, neutered female, 2.5 years | Biventricular hydrocephalus                                     | Obtundation                                                          | 8                         | Ventricle: 26.8<br>Brain: 88.2<br>V/B index: 0.3  | Ventricle: 6.9<br>Brain: 108.1<br>V/B index: 0.06 | 74.3%                           | none                                                                 |
| 10 | Chihuahua, male, 12 months                   | Tetraventricular hydrocephalus                                  | Aimless barking, circling, head tilt                                 | 12                        | Ventricle: 16.4<br>Brain: 56.3                    | Ventricle: 8.3<br>Brain: 64.8                     | 49.9%                           | none                                                                 |

|    |                                                         |                                                                 |                                                                                     |        |                                                   |                                                     |        |                                                                                 |
|----|---------------------------------------------------------|-----------------------------------------------------------------|-------------------------------------------------------------------------------------|--------|---------------------------------------------------|-----------------------------------------------------|--------|---------------------------------------------------------------------------------|
|    |                                                         |                                                                 |                                                                                     |        | V/B index: 0.28                                   | V/B index: 0.12                                     |        |                                                                                 |
| 11 | Labrador, neutered male, 2 years                        | Triventricular hydrocephalus                                    | Obtundation, ataxia of all four limbs, ventrolateral strabism                       | 2 days | Ventricle: 28.6<br>Brain: 86<br>V/B index: 0.33   | Ventricle: 5.8<br>Brain: 108.8<br>V/B index: 0.05   | 79.8 % | none                                                                            |
| 12 | English bulldog, male, 3 years                          | Triventricular hydrocephalus                                    | Obtundation, circling, ataxia of all 4 limbs                                        | 8      | Ventricle: 24.5<br>Brain: 89.6<br>V/B index: 0.27 | Ventricle: 16.6<br>Brain: 98.2<br>V/B index: 0.16   | 32.3%  | none                                                                            |
| 13 | Chihuahua mix, male, 14 weeks                           | Tetraentricular hydrocephalus                                   | Obtundation, circling, central blindness, head tilt, ventrolateral strabismus       | 2 days | Ventricle: 16.4<br>Brain: 41.8<br>V/B index: 0.39 | Ventricle: 16.4<br>Brain: 41.8<br>V/B index: 0.39   | 0      | Obtundation, circling, central blindness, head tilt, ventrolateral strabismus   |
| 14 | German Shepherd dog mixed breed, neutered male, 2 years | Tetraentricular hydrocephalus, severe syringomyelia             | Obtundation and ataxia on all four limbs, unilateral ventral strabismus, head tilt. | 1      | Ventricle: 32.7<br>Brain: 94.2<br>V/B index: 0.34 | Ventricle: 16.4<br>Brain: 114.3<br>V/B index: 0.14  | 49.9%  | none                                                                            |
| 15 | Tibet spaniel, male, 3 years                            | Triventricular hydrocephalus                                    | Obtundation, ataxia on all four limbs, head tilt, nystagmus                         | 2      | Ventricle: 19.4<br>Brain: 79.8<br>V/B index:      | Ventricle: 19.4<br>Brain: 79.8<br>V/B index:        | 0      | Obtundation, ataxia of all four limbs, head tilt, nystagmus                     |
| 16 | Jack Russel terrier, male, 4 months                     | Triventricular hydrocephalus                                    | Aimless screaming, obtundation, ataxia of all four limbs                            | 2      | Ventricle: 20.2<br>Brain: 64.9<br>V/B index: 31.1 | Ventricle: 9.4<br>Brain: 75.7<br>V/B index: 0.12    | 53.5%  | none                                                                            |
| 17 | Groenendale, neutered female, 4 years                   | Tetraentricular hydrocephalus                                   | Aimless screaming, obtundation, ataxia of all four limbs                            | 8      | Ventricle: 22.6<br>Brain: 74.3<br>V/B index: 0.3  | Ventricle: 18.4<br>Brain: 78.5<br>V/B index: 0.23   | 18.6%  | none                                                                            |
| 18 | Papillon, female, 7 months                              | Biventricular hydrocephalus, supracollicular fluid accumulation | Obtundation, ataxia of all four limbs, Ventrolateral strabism, circling             | 72     | Ventricle: 18.2<br>Brain: 55.8<br>V/B index: 0.32 | Ventricle: 18.2<br>Brain: 55.8<br>V/B index: 0.32   | 0      | Obtundation, ataxia, Ventrolateral strabismus, circling                         |
| 19 | Mixed breed, male, 3 months                             | Biventricular hydrocephalus                                     | Central blindness, circling, ataxia of all four limbs, ventrolateral strabismus     | 8      | Ventricle: 18.8<br>Brain: 56.2<br>V/B index: 0.33 | Ventricle: 18.8<br>Brain: 56.2<br>V/B index: 0.33   | 0      | Central blindness, circling, ataxia of all four limbs, ventrolateral strabismus |
| 20 | Cavalier King Charles spaniel, male, 5 years            | Triventricular hydrocephalus                                    | Obtundation                                                                         | 16     | Ventricle: 18.6<br>Brain: 84.5<br>V/B index: 0.22 | Ventricle: 0.32<br>Brain: 102.7<br>V/B index: 0.003 | 98%    | none                                                                            |
| 21 | Austrian hound, male, 5 years                           | Triventricular hydrocephalus                                    | Obtundation, circling, head tremor, nystagmus                                       | 1 day  | Ventricle: 21.8<br>Brain: 82.8<br>V/B index: 0.26 | Ventricle: 5.6<br>Brain: 95<br>V/B index: 0.05      | 73.4%  | none                                                                            |

|    |                                             |                                                                  |                                                              |       |                                                   |                                                    |       |                                          |
|----|---------------------------------------------|------------------------------------------------------------------|--------------------------------------------------------------|-------|---------------------------------------------------|----------------------------------------------------|-------|------------------------------------------|
| 22 | English bulldog, male, 9 months             | Biventricular hydrocephalus, supracollicular fluid accumulation  | Obtundation, hyperaesthesia of head and neck                 | 4     | Ventricle: 24.7<br>Brain: 92.2<br>V/B index: 0.26 | Ventricle: 12.8<br>Brain: 103.1<br>V/B index: 0.12 | 42.8% | none                                     |
| 23 | Pug, neutered male, 2 months                | Biventricular hydrocephalus                                      | Obtundation, ataxia of all four limbs                        | 16    | Ventricle: 16.6<br>Brain: 48<br>V/B index: 0.34   | Ventricle: 10.4<br>Brain: 53.8<br>V/B index: 0.19  | 37.4% | none                                     |
| 24 | Bullterrier, female, 3 years                | Biventricular hydrocephalus                                      | Obtundation                                                  | 20    | Ventricle: 26.7<br>Brain: 83<br>V/B index: 0.32   | Ventricle: 18.4<br>Brain: 91.5<br>V/B index: 0.2   | 31.1% | none                                     |
| 25 | Peruvian hairless dog, male, 4 months       | Biventricular hydrocephalus                                      | Ataxia of all four limbs, circling, central blindness        | 3     | Ventricle: 22.4<br>Brain: 63<br>V/B index: 0.35   | Ventricle: 18.2<br>Brain: 67.2<br>V/B index: 0.27  | 18.7% | none                                     |
| 26 | Shitzu, male, 4 months                      | Triventricular hydrocephalus, supracollicular fluid accumulation | Circling, central blindness, obtundation                     | 4     | Ventricle: 16.5<br>Brain: 38<br>V/B index: 0.43   | Ventricle: 9.4<br>Brain: 45.1<br>V/B index: 0.2    | 43.1% | Circling                                 |
| 27 | English bulldog, male, 6 months             | Biventricular hydrocephalus                                      | Central blindness, obtundation, seizures                     | 5     | Ventricle: 16.8<br>Brain: 74.2<br>V/B index: 0.22 | Ventricle: 16.8<br>Brain: 74.2<br>V/B index: 0.22  | 0%    | Central blindness, obtundation, seizures |
| 28 | Boxer, female, 15 months                    | Tetraventricular hydrocephalus                                   | Tetraparesis, nystagmus obtundation                          | 1 day | Ventricle: 26.7<br>Brain: 82<br>V/B index: 0.32   | Ventricle: 6.8<br>Brain: 101.9<br>V/B index: 0.06  | 74.6% | none                                     |
| 29 | West Highland White terrier, male, 3 months | Biventricular hydrocephalus, supracollicular fluid accumulation  | Ataxia all four limbs, obtundation, ventrolateral strabismus | 3     | Ventricle: 18.6<br>Brain: 62.8<br>V/B index: 0.29 | Ventricle: 9.2<br>Brain: 72.2<br>V/B index: 0.12   | 50.6% | none                                     |
| 30 | Miniature bullterrier, female, 9 months     | Tetraventricular hydrocephalus, syringomyelia                    | Obtundation, ataxia of all four limbs, pain in neck and head | 2     | Ventricle: 22.8<br>Brain: 72.6<br>V/B index: 0.29 | Ventricle: 16.2<br>Brain: 79.8<br>V/B index: 0.2   | 29%   | none                                     |
| 31 | Austrian hound, male, 4 months              | Tetraventricular hydrocephalus, syringomyelia                    | Obtundation, ataxia of all four limbs                        | 6     | Ventricle: 18.9<br>Brain: 65.2<br>V/B index:      | Ventricle: 14.1<br>Brain: 70<br>V/B index:         | 25.4% | none                                     |
| 32 | Rottweiler, neutered male, 3 years          | Triventricular hydrocephalus, syringomyelia                      | Obtundation, aggression, pain at head and neck               | 2     | Ventricle: 13.6<br>Brain: 110<br>V/B index: 0.12  | Ventricle: 5.6<br>Brain: 118<br>V/B index: 0.04    | 58.9% | none                                     |
| 33 | German Shepherd dog, female, 5 months       | Triventricular hydrocephalus                                     | Ataxia of all four limbs, central blindness                  | 8     | Ventricle: 24.6<br>Brain: 64.3<br>V/B index: 0.38 | Ventricle: 18.4<br>Brain: 70.5<br>V/B index: 0.26  | 25.2% | none                                     |
| 34 | German Pinscher, neutered male, 18 months   | Biventricular hydrocephalus                                      | Obtundation, central blindness, head tilt                    | 6     | Ventricle: 22.9<br>Brain: 74.2<br>V/B index: 0.3  | Ventricle: 8.2<br>Brain: 88.9<br>V/B index: 0.1    | 64.2% | Central blindness                        |

|    |                                             |                                                                  |                                                         |    |                                                   |                                                   |        |                             |
|----|---------------------------------------------|------------------------------------------------------------------|---------------------------------------------------------|----|---------------------------------------------------|---------------------------------------------------|--------|-----------------------------|
| 35 | Labrador retriever, male, 18 months         | Triventricular hydrocephalus                                     | central blindness, circling                             | 12 | Ventricle: 22.4<br>Brain: 82<br>V/B index: 0.25   | Ventricle: 22.4<br>Brain: 82<br>V/B index: 0.25   | 0%     | central blindness, circling |
| 36 | Chihuahua, female, 6 months                 | Triventricular hydrocephalus, syringomyelia                      | Circling, head tilt                                     | 16 | Ventricle: 18.5<br>Brain: 62.4<br>V/B index: 0.29 | Ventricle: 12.5<br>Brain: 68.8<br>V/B index: 0.18 | 30.9%  | none                        |
| 37 | Chihuahua, neutered male, 2 years           | Triventricular hydrocephalus, syringomyelia                      | Obtundation                                             | 20 | Ventricle: 19.4<br>Brain: 64.9<br>V/B index: 0.29 | Ventricle: 5.6<br>Brain: 78.7<br>V/B index: 0.07  | 71.2%  | none                        |
| 38 | French bulldog, male, 3 years               | Tetraentricular hydrocephalus                                    | Obtundation, ataxia of all four limbs                   | 12 | Ventricle: 22.2<br>Brain: 76<br>V/B index: 0.29   | Ventricle: 3.6<br>Brain: 85<br>V/B index: 0.04    | 83.8 % | none                        |
| 39 | Chihuahua, female, 9 months                 | Triventricular hydrocephalus                                     | Obtundation                                             | 24 | Ventricle:19.8<br>Brain: 56.8<br>V/B index: 0.34  | Ventricle: 4.2<br>Brain: 76.4<br>V/B index: 0.05  | 78.9%  | none                        |
| 40 | Chihuahua, male, 4 months                   | Triventricular hydrocephalus, supracollicular fluid accumulation | Central blindness obtundation, ataxia of all four limbs | 6  | Ventricle: 18.4<br>Brain: 59.7<br>V/B index: 0.3  | Ventricle: 3.1<br>Brain: 72.8<br>V/B index: 0.04  | 83.2%  | none                        |
| 41 | West Highland White terrier, male, 6 months | Triventricular hydrocephalus, syringomyelia                      | Circling, obtundation                                   | 8  | Ventricle: 16.5<br>Brain: 45.2<br>V/B index: 0.36 | Ventricle: 6.1<br>Brain: 55.6<br>V/B index: 0.1   | 63.1%  | none                        |
| 42 | Continental bulldog, female, 1 year         | Triventricular hydrocephalus, supracollicular fluid accumulation | Head tilt, obtundation                                  | 12 | Ventricle: 24.5<br>Brain: 83.3<br>V/B index: 0.29 | Ventricle: 12.6<br>Brain: 95.2<br>V/B index: 0.13 | 48.6%  | none                        |
| 43 | French bulldog, female, 6 months            | Triventricular hydrocephalus                                     | Obtundation                                             | 4  | Ventricle: 20.2<br>Brain: 58.5<br>V/B index: 0.34 | Ventricle: 12.9<br>Brain: 65.8<br>V/B index: 0.19 | 36.2%  | none                        |
| 44 | Rhodesian Ridgeback, female, 3 months       | Tretaventricular hydrocephalus, syringomyelia                    | Head tilt                                               | 1  | Ventricle: 21.6<br>Brain: 66.3<br>V/B index: 0.32 | Ventricle: 13.2<br>Brain: 74.2<br>V/B index: 0.17 | 36.6%  | none                        |
| 45 | French bulldog, male, 3 years               | Biventricular hydrocephalus                                      | Obtundation                                             | 8  | Ventricle: 23.2<br>Brain: 64.6<br>V/B index:      | Ventricle: 15<br>Brain: 72.8<br>V/B index:        | 35.5%  | none                        |
